# Supplementary material for: Enhancing ink adhesion of specialty paper using an interpenetrating polyvinyl alcohol-blocked polyurethane polymer network sizing system
Source: Royal Society of Chemistry journal article supplement (doi:10.1039/d1ra08139j), 2022-01-01
Supplement: d1ra08139j1.pdf [file d1ra08139j1.pdf]

## Supporting Information

### Enhancing Ink Adhesion of Specialty Paper by Interpenetrating Polyvinyl Alcohol-Blocked Polyurethane Polymer Network Sizing System

Yihe Liu<sup>a</sup>, Yiding Shen<sup>a,\*</sup>, Xiaorui Li<sup>a</sup>, Yuanyuan Dang<sup>a</sup>, Lintao Li<sup>a</sup>, Kai Yang<sup>a,\*</sup>

<sup>a</sup> Shaanxi Key Laboratory of Chemical Additives for Industry, Shaanxi University of  
Science and Technology, Xi'an 710021, China

\* Corresponding authors.

E-mail addresses: [ydshen@sust.edu.cn](mailto:ydshen@sust.edu.cn) (Y. Shen, lead contact),

[goshmusic@163.com](mailto:goshmusic@163.com) (K. Yang).

## 1. Synthesis of TBPUs and composite of TBPU/PVAs

### Reaction 1

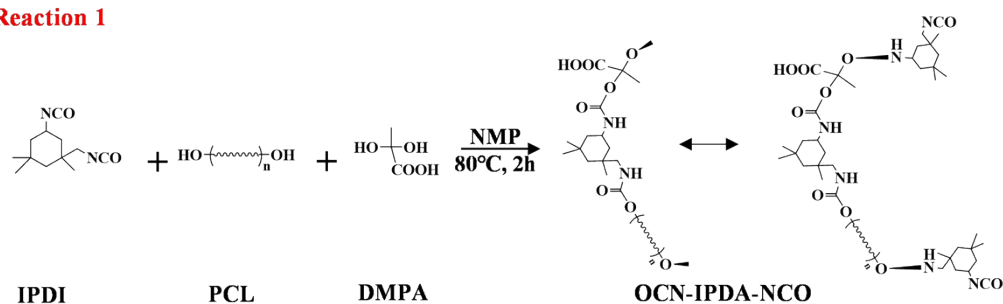

### Reaction 2

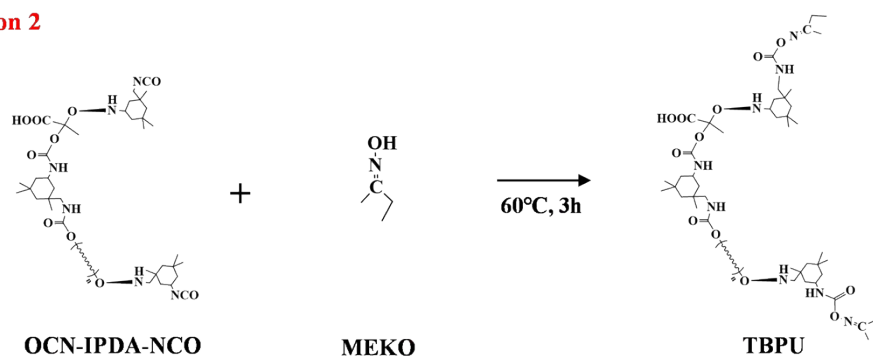

Figure S1. Synthetic route of water-based closed polyurethane TBPU.

Table S1 Formula of different sizing systems.

| Surface sizing agents | Dosage | content   |          |                |                |                       |
|-----------------------|--------|-----------|----------|----------------|----------------|-----------------------|
|                       |        | TBPU /wt% | PVA /wt% | Lubricant /wt% | Penetrant /wt% | H <sub>2</sub> O /wt% |
| I                     | 100g   | —         | —        | —              | —              | 100                   |
| II                    |        | 3.0       | —        | 1.0            | 1.0            | 95                    |
| III                   |        | —         | 40       | 1.0            | 1.0            | 58                    |
| IV                    |        | 3.0       | 40       | 1.0            | 1.0            | 55                    |

I: Untreated paper. II: TBPU-sized paper. III: PVA-sized paper. IV: TBPU/PVA-sized paper.

Solid content: TBPU (30%),  $n[(\text{NCO})/(\text{OH})] = 1.6$ ,  $w(\text{DMPA}) = 9.5\%$ ; PVA1799 (10%)

## 2. Owens two-liquids method for calculation of surface free energy

Using Owens two-liquid method to calculate the surface free energy of paper samples. And the two liquids we adopted are distilled water and ethylene glycol.

Table S2 SFE components of two liquids.

| SFE components  | $\gamma_t$ (mJ·m <sup>-2</sup> ) | $\gamma^p_t$ (mJ·m <sup>-2</sup> ) | $\gamma^d_t$ (mJ·m <sup>-2</sup> ) | $\gamma^p_t/\gamma^d_t$ |
|-----------------|----------------------------------|------------------------------------|------------------------------------|-------------------------|
| Distilled water | 72.8                             | 51.0                               | 21.8                               | 2.36                    |
| Ethandiol       | 48.3                             | 19.0                               | 29.3                               | 0.65                    |

### 3. XPS analyses

**Table S3** Carbon, Nitrogen, and Oxygen Contents for paper samples

| Paper samples | Wide  |       |       | Ratio of O/C |
|---------------|-------|-------|-------|--------------|
|               | C 1s  | O 1s  | N 1s  |              |
| I             | 35.97 | 62.85 | 1.18  | 1.747        |
| IV            | 47.18 | 42.76 | 10.06 | 0.906        |
| I (ink)       | 62.56 | 31.28 | 6.16  | —            |
| IV (ink)      | 56.71 | 35.42 | 7.87  | —            |

**Table S4** C 1s assignment and O 1s assignment for paper samples

| Paper samples | C 1s assignment (%) |       |             |             | O 1s assignment (%) |       |       |       |
|---------------|---------------------|-------|-------------|-------------|---------------------|-------|-------|-------|
|               | C-H                 | C-C   | C-O/<br>C-N | C=O/<br>C=N | O=C                 | O-N-C | OH-C  | C-O-C |
| I             | 35.64               | 41.44 | 22.92       | —           | —                   | —     | 86.49 | 13.51 |
| IV            | 1.48                | 51.13 | 38.01       | 9.37        | 16.45               | 20.62 | 28.53 | 34.40 |
| I (ink)       | 13.66               | 49.87 | 28.88       | 7.59        | —                   | 3.34  | 94.79 | 1.87  |
| IV (ink)      | 9.20                | 49.98 | 34.15       | 6.67        | 2.36                | 69.50 | 16.63 | 11.50 |

**Table S5** SFE data of sizing samples

| Samples | Contact angle /° |            | $\gamma^p_s$ (mJ·m <sup>-2</sup> ) | $\gamma^d_s$ (mJ·m <sup>-2</sup> ) | $\gamma_s$ (mJ·m <sup>-2</sup> ) | $\gamma^p_s/\gamma^d_s$ |
|---------|------------------|------------|------------------------------------|------------------------------------|----------------------------------|-------------------------|
|         | $\theta_1$       | $\theta_2$ |                                    |                                    |                                  |                         |
| I       | 85.5             | 64.2       | 0.30                               | 35.45                              | 35.75                            | 0.0085                  |
| II      | 93.1             | 57.3       | 0.42                               | 40.22                              | 40.64                            | 0.0104                  |
| III     | 91.7             | 30.1       | 1.30                               | 85.31                              | 86.62                            | 0.0152                  |
| IV      | 98.1             | 58.6       | 2.12                               | 31.35                              | 58.60                            | 0.0676                  |

I: Untreated paper. II: TBPU-sized paper. III: PVA-sized paper. IV: TBPU/PVA-sized paper.

### 4. Ink absorption behavior on sizing surface

Figure S2 were obtained after a same condition (contact time, dosage of ink, temperature etc.). When the ink was dropped on the surfaces of sized paper, it left gamut area of different sizes on the untreated and sizing surfaces. Unsurprisingly, gamut area on the TBPU/PVA sizing surface had a biggest size. This ability to adhere ink particles could be attributed to the strong polarity of the sizing layer and the high compactness of TBPU/PVA sized paper. As a result, the utilization of this composite surface sizing could adhere ink particles and facilitate ink penetration. It could be explained that the interaction of paper surface physical properties and paper surface chemistry (such as coulombic forces, hydrogen bonds and van der Waals forces, etc.) that determined the ink particles fixations, spreading or absorption.

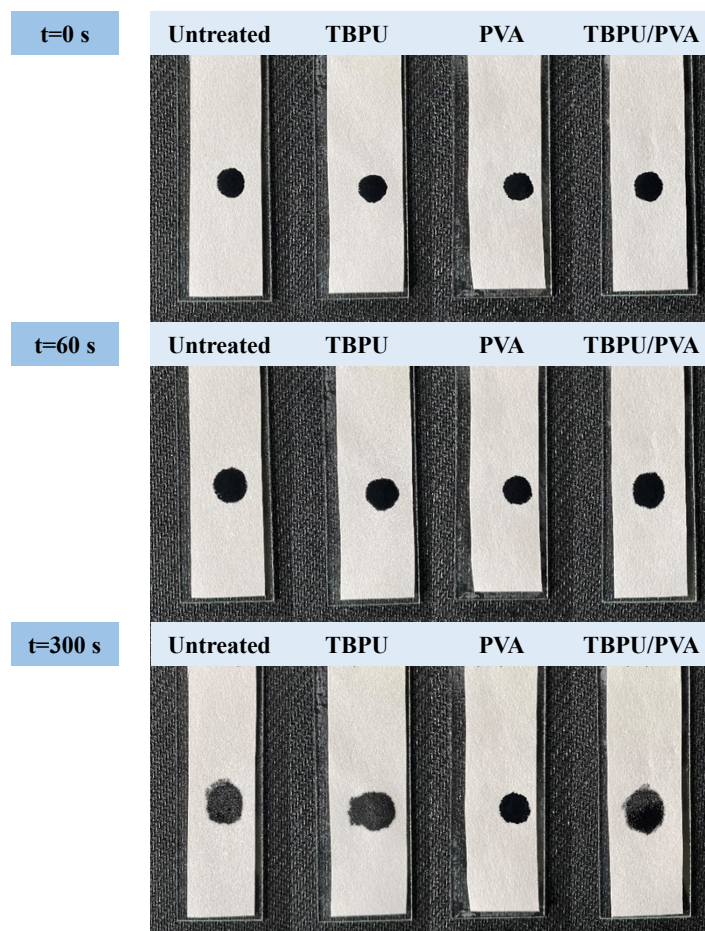

Figure S2. Status of ink penetration left by the ink on the untreated surface, TBPU sizing surface, PVA sizing surface and TBPU/PVA sizing surfaces.

**Table S6** Ink adhesion of samples

| Sizing agents | Ink peeling rate/% | Peel resistance grade |
|---------------|--------------------|-----------------------|
| Untreated     | 66                 | D                     |
| PVA           | 44                 | C                     |
| TBPU          | 27                 | B                     |
| SAE           | 18                 | B                     |
| PU(SJ-28)/PVA | 9                  | A                     |
| TBPU/PVA      | 6                  | A                     |

A: less than 10%; B: 10%-35%; C: 35-65%; D: more than 65%

##### 5. Rating criteria of color fastnesses (ink retention class)

The rating criteria presented below are the five arbitrary levels of evaluation rating set after our visual inspection of the samples on the 5 rating system. Class 5 is for no staining/color change, 4 for slightly staining/color change, 3 for noticeable staining/color change, 2 for considerable staining/color change and 1 for excessive staining/color change.
